# Supplementary material
Source: PubMed Central journal article supplement (PMC5964501)
Supplement: IAI.00224-18_zii999092425s1.pdf [file IAI.00224-18_zii999092425s1.pdf]

1 **Supplementary Materials**

2 **Supplementary Figures**

3 **Supplementary Figure 1. Relative expression levels of *cobB* and *yfiQ* genes in the wild-type**

4 ***Y. pestis* strain 201 grown in LB medium.** *Y. pestis* 201 was grown in LB broth and the  
5 bacterial cells were harvested during the different growth phases as indicated. Relative *cobB* and  
6 *yfiQ* transcript levels were determined by qRT-PCR and the expression levels were normalized  
7 to 16s RNA expression.

8 **Supplementary Figure 2. Mutation of *yfiQ* or *cobB* does not influence bacterial growth.**

9 The wild-type strain, along with the *cobB* and *yfiQ* mutants and the complemented strains were  
10 inoculated individually into fresh LB broth (A) or TMH medium (B) at an OD<sub>620</sub> of 0.1, and the  
11 growth curves were recorded continuously for 24 h. Each time point is the average of three  
12 measurements and the error bars represent the standard deviations.

13 **Supplementary Figure 3. Functional classification of genes that were differently expressed**  
14 **in the *cobB* and *yfiQ* mutants compared with the parental *Y. pestis* strain.** DEGs in  $\Delta cobB$   
15 (A) and  $\Delta yfiQ$  (B) were classified according to their functional categories.

16 **Supplementary Figure 4. Correlations between the fold changes in gene expression**

17 **measured by qRT-PCR and RNA-seq.** Correlations between the qRT-PCR and the RNA-seq  
18 data were analyzed using a linear regression method. The correlation coefficient ( $R^2$ ) is shown  
19 for  $\Delta cobB$ /WT (A) and  $\Delta yfiQ$ /WT (B).

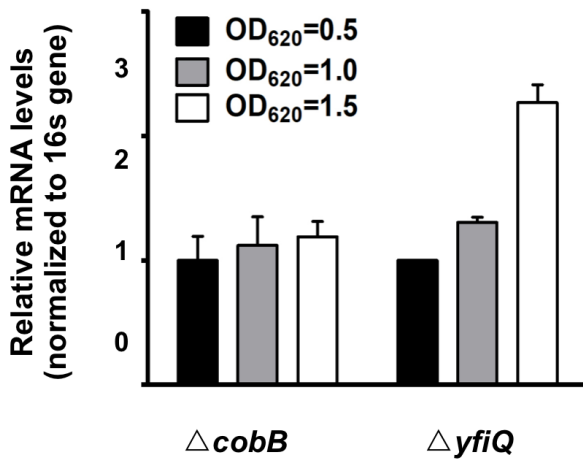

Supplementary Figure 1

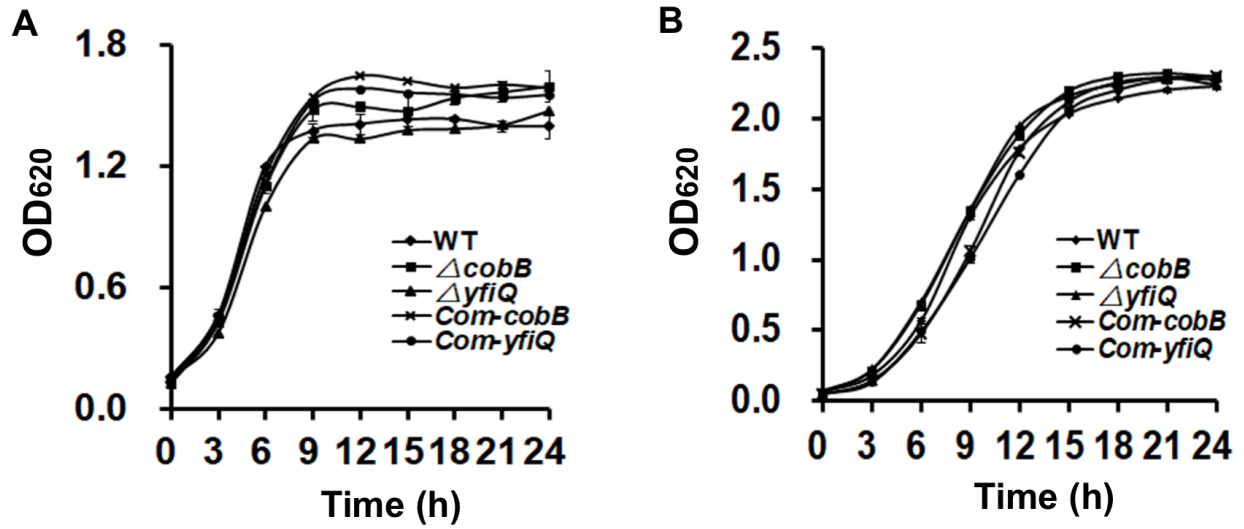

Supplementary Figure 2

20

21

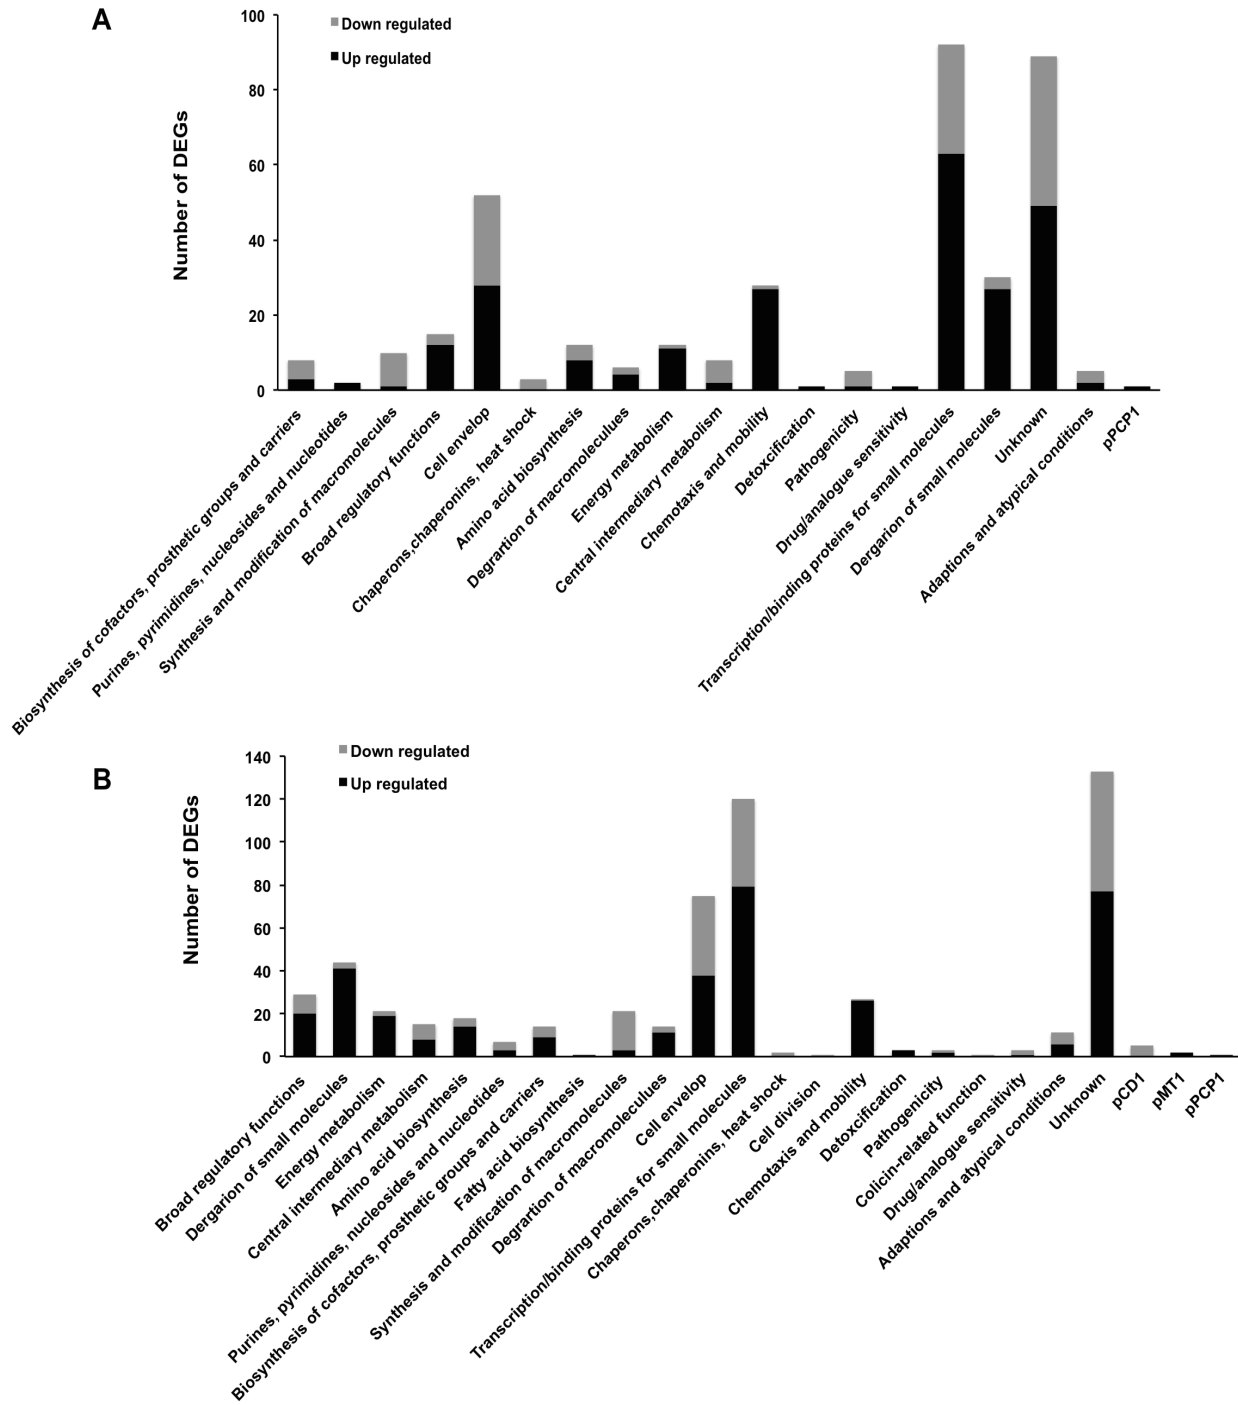

22

Supplementary Figure 3

23

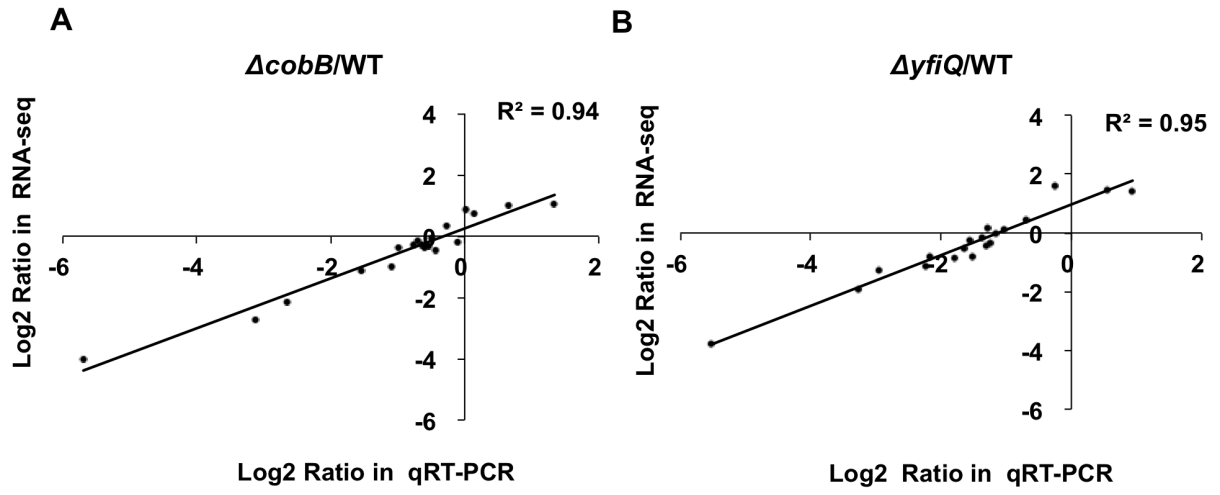

Supplementary Figure 4

24

25

26 **Supplementary Tables**

27 **Supplementary Table 1. Primers used in this study.**

| Name       | Primer (5'-3')                                               |
|------------|--------------------------------------------------------------|
| CobB-K-F   | ATGCGCATTGCCATAGGCTGTGTCGGTTTCGTAAGAGTAGTGTAGGCTGGAGCTGCTTC  |
| CobB-K-R   | TCAATCCCCCTGACGATTCTCACCGCATGTGGTCAGAAACCATATGAATATCCTCCTTA  |
| CobB-I-F   | AGCGTTTCTGCATTTGGCAG                                         |
| CobB-I-R   | GACGACCTGCAACACTAATC                                         |
| CobB-F     | CGTTGTGCTTACTGGTGCTG                                         |
| CobB-R     | ATGGCCTGAAGTGCCAATTG                                         |
| CobB-COM-F | CGCGCATGCGCCATCGCGGTTGTATAGAG                                |
| CobB-COM-R | ACGCGTCGACAGTTATCTGAATGAGTTGAG                               |
| CobB-EXP-F | CGCGGATCCATGCGCATTGCCATAGGCTGTG                              |
| CobB-EXP-R | ACGCGTCGACTCAATCCCCCTGACGATTCTCAC                            |
| YfiQ-K-F   | ATGAGCCAACGTGGATTAGAAGCACTGTTACGTCCGAAATGTGTAGGCTGGAGCTGCTTC |
| YfiQ-K-R   | TCAAAGTGTGACGCTCCAGATTTACGATCCCATCTTCTATTCATATGAATATCCTCCTTA |
| YfiQ-I-F   | AGTCGCCACCGCGCTGCTCC                                         |
| YfiQ-I-R   | ACAGTGCCTTCTTCTCTTG                                          |
| YfiQ-F     | GCGGTGTCTTGGCTTACGCC                                         |
| YfiQ-R     | GATCATCTTCTCAAGTAATG                                         |
| YfiQ-COM-F | CGCGGATCCCTCTGCGTCAACCTTATGTG                                |
| YfiQ-COM-R | ACGCGTCGACATCACGCTGATTGGTGTAAC                               |
| YfiQ-EXP-F | CGCGGATCCATGAGCCAACGTGGATTAGAAGCAC                           |
| YfiQ-EXP-R | ACGCGTCGACTCAAAGTGTGACGCTCCAGATTTACG                         |
| Kana-I-R   | GCCGATTGTCTGTTGTGCC                                          |
| Kana-I-F   | GGCTGGGTGTGGCGGACCGC                                         |
| CobB-RT-F  | CATCAACGTTTTTCGCTCCC                                         |
| CobB-RT-R  | ACGAAAAGTACGGATACCC                                          |
| YfiQ-RT-F  | TGCTGCGAGTACAGGATACCC                                        |
| YfiQ-RT-R  | CTGACAATCAACAGCCGTTCCACC                                     |
| hmsS-RT-F  | ACGGAACAGCGTCTGCTAC                                          |
| hmsS-RT-R  | GATATAATGCAATCGTCGTC                                         |
| wzxE-RT-F  | CACTGTCTCGGCTGAAGG                                           |
| wzxE-RT-R  | TTTAATACATCGCCCACC                                           |
| katA-RT-F  | GTGCTAAATGTCCGTTCC                                           |
| katA-RT-R  | AAATCAGGCTGTTCTTGG                                           |
| yscL-RT-F  | AGAGGTGACTGCCGATGC                                           |
| yscL-RT-R  | TATTGCCCGAGAAAGTGC                                           |
| yscM-RT-F  | AAACTAACCCTCACAGAG                                           |

|            |                        |
|------------|------------------------|
| yscM-RT-R  | TGGTAATAAGCAGGCAAT     |
| Pla-RT-F   | GGAGTGCGGGTAATAGGT     |
| Pla-RT-R   | GTGAGCCGGATGTCTTCT     |
| adiA-RT-F  | GTCACAAGAAACGCAACG     |
| adiA-RT-R  | ACAACGAAGAGTCGGAGA     |
| hmsT-RT-F  | CAGTATGCTATCATCGTCGC   |
| hmsT-RT-R  | GTAGACCGATGAGGATTG     |
| espC3-RT-F | AGGCTTCGGTTTCATCAC     |
| espC3-RT-R | GCAGACGGACCTTTAGCA     |
| caf1R-RT-F | ATTCGCAACAGACATTCA     |
| caf1R-RT-R | CCTTCTACCCAACAAACC     |
| ilvC-RT-F  | CAGCACTGGGTTACTCGC     |
| ilvC-RT-R  | CTTCGCCTTTAGGGTCGT     |
| uspB-RT-F  | GTGACCCGTTGTTGTATC     |
| uspB-RT-R  | CTAAACCACATAACGCACT    |
| uspA2-RT-F | GCCAAACCGTACAATGCC     |
| uspA2-RT-R | ATCACCGCTGCCGCTTAA     |
| lytT-RT-F  | GGCGAAGACACTGACACG     |
| lytT-RT-R  | GCTGGGTATAACCTGATTGC   |
| htpG-RT-F  | CTCCTCCATTTGATGATTC    |
| htpG-RT-R  | CAGGGTTAAAGTACGTTTCT   |
| grpE-RT-F  | AGAGCAGCAAGTGGAAGC     |
| grpE-RT-R  | TCAGTACGACGACGGATA     |
| ibpB-RT-F  | CCACTATCGCATCTCACTG    |
| ibpB-RT-R  | CAAACCTGGGCATTATCAAC   |
| phoR-RT-F  | GCCTGCATTATTACTGGG     |
| rcsB-RT-F  | GGGATAAGTATGGTGATGG    |
| rcsB-RT-R  | AGGTAAGTCAGCGGGTGC     |
| phoR-RT-R  | CGGTGTCATACTGCGATC     |
| 16S-RT-F   | GCCCACTGGAAGTGAACACG   |
| 16S-RT-R   | CGCTGAAAGTGCTTTACAACCC |

---

28

29

30 **Supplementary Table 2. The CobB-dependent or YfiQ-dependent genes involved in stress**  
 31 **response and virulence as determined by RNA-seq and quantitative RT-PCR analyses.**

32

| geneID    | Name         | Product                                               | log <sub>2</sub> Ratio ( $\Delta$ <i>cobB</i> /WT) |         | log <sub>2</sub> Ratio ( $\Delta$ <i>yfiQ</i> /WT) |         |
|-----------|--------------|-------------------------------------------------------|----------------------------------------------------|---------|----------------------------------------------------|---------|
|           |              |                                                       | qRT-PCR                                            | RNA-seq | qRT-PCR                                            | RNA-seq |
| YP_pCD21  | <i>yscM</i>  | putative type III secretion regulatory protein YscM   | -0.61                                              | -0.36   | -1.16                                              | -0.02   |
| YP_pCD22  | <i>yscL</i>  | type III secretion system protein                     | -0.43                                              | -0.47   | -1.51                                              | -0.79   |
| YP_3187   | <i>wzxE</i>  | lipopolysaccharide biosynthesis protein               | -0.53                                              | -0.32   | -2.17                                              | -0.80   |
| YP_3332   | <i>uspB</i>  | universal stress protein UspB                         | -0.75                                              | -0.29   | -1.29                                              | 0.15    |
| YP_3333   | <i>uspA2</i> | universal stress protein A                            | 0.02                                               | 0.89    | -0.25                                              | 1.58    |
| YP_0919   | <i>rcsB</i>  | transcriptional regulator RcsB                        | -0.69                                              | -0.16   | -1.31                                              | -0.42   |
| YP_pPCP08 | <i>pla</i>   | outer membrane protease                               | 1.34                                               | 1.04    | 0.94                                               | 1.43    |
| YP_0728   | <i>phoR</i>  | phosphate regulon sensor protein                      | -0.10                                              | -0.20   | -1.65                                              | -0.52   |
| YP_0397   | <i>lytT</i>  | two-component response-regulatory protein YehT        | 0.65                                               | 1.00    | 0.54                                               | 1.45    |
| YP_0931   | <i>katA</i>  | catalase                                              | -0.99                                              | -0.38   | -1.03                                              | 0.11    |
| YP_3158   | <i>ilvC</i>  | ketol-acid reductoisomerase                           | -3.11                                              | -2.71   | -2.24                                              | -1.13   |
| YP_3993   | <i>ibpB</i>  | heat shock chaperone IbpB                             | -1.10                                              | -0.98   | -1.24                                              | -0.34   |
| YP_0811   | <i>htpG</i>  | heat shock protein 90                                 | -1.53                                              | -1.15   | -1.79                                              | -0.84   |
| YP_1698   | <i>hmsS</i>  | hemin storage system protein                          | -2.64                                              | -2.14   | -3.28                                              | -1.94   |
| YP_1049   | <i>grpE</i>  | heat shock protein GrpE                               | -0.64                                              | -0.27   | -1.56                                              | -0.23   |
| YP_0936   | <i>adiA</i>  | amino acid decarboxylase                              | -5.69                                              | -4.00   | -5.53                                              | -3.77   |
| YP_3756   | <i>hmsT</i>  | HmsT protein                                          | 0.15                                               | 0.76    | -0.70                                              | 0.45    |
| YP_1786   | <i>cspC3</i> | cold shock protein                                    | -0.50                                              | -0.05   | -2.94                                              | -1.28   |
| YP_pMT085 | <i>caf1R</i> | putative F1 operon positive regulatory protein, caf1R | -0.27                                              | 0.34    | -1.38                                              | -0.17   |

33
